# Supplementary material for: Separation of Antioxidants from Trace Fraction of Ribes himalense via Chromatographic Strategy and Their Antioxidant Activity Supported with Molecular Simulations
Source: MDPI journal article supplement (doi:10.3390/ijms25010227), 2023-12-22

## Supporting Information

**Separation of antioxidants from trace fraction of *Ribes himalense* via chromatographic strategy and their antioxidant activity supported by molecular simulations**

Youyi Liu<sup>1, †</sup>, Chuang Liu<sup>1,2, †</sup>, Yuqing Lei<sup>1,2</sup>, Jingrou Guo<sup>1</sup>, Xingyi Chen<sup>1</sup>, and Minchen Wu<sup>1, \*</sup>

<sup>1</sup>*Wuxi School of Medicine, Jiangnan University, Wuxi 214122, China*

<sup>2</sup>*School of Biotechnology, Jiangnan University, Wuxi 214122, China*

## Table of Contents

|                                                                                                  |    |
|--------------------------------------------------------------------------------------------------|----|
| Figure S1. Apparatus diagrams .....                                                              | 3  |
| Figure S2. Schematic diagram of substance extraction process .....                               | 4  |
| Figure S3. ESI-MS data of Fr4-1-1 .....                                                          | 5  |
| Figure S4. <sup>1</sup> H NMR (600 MHz) data of Fr4-1-1 (in DMSO- <i>d</i> <sub>6</sub> ) .....  | 6  |
| Figure S5. <sup>13</sup> C NMR (151 MHz) data of Fr4-1-1 (in DMSO- <i>d</i> <sub>6</sub> ) ..... | 7  |
| Figure S6. HR-ESI-MS data of Fr4-1-2 .....                                                       | 8  |
| Figure S7. <sup>1</sup> H NMR (600 MHz) data of Fr4-1-2 (in MeOH- <i>d</i> <sub>4</sub> ) .....  | 9  |
| Figure S8. <sup>13</sup> C NMR (151 MHz) data of Fr4-1-2 (in MeOH- <i>d</i> <sub>4</sub> ) ..... | 10 |
| Figure S9. HMBC data of Fr4-1-2 (in MeOH- <i>d</i> <sub>4</sub> ) .....                          | 11 |
| Figure S10. ESI-MS data of Fr4-2 .....                                                           | 12 |
| Figure S11. <sup>1</sup> H NMR (600 MHz) data of Fr4-2 (in DMSO- <i>d</i> <sub>6</sub> ) .....   | 13 |
| Figure S12. <sup>13</sup> C NMR (151 MHz) data of Fr4-2 (in DMSO- <i>d</i> <sub>6</sub> ) .....  | 14 |
| Figure S13. Docking results of antioxidants with target proteins .....                           | 15 |
| Figure S14. Histogram of all docking results .....                                               | 16 |
| Figure S15. The binding sites of small molecule ligands and target proteins .....                | 17 |

**Figure S1. Apparatus diagrams**

The actual polyamide-MPLC system (A) and the schematic diagram of online HPLC-DPPH screening system (B).

**A**

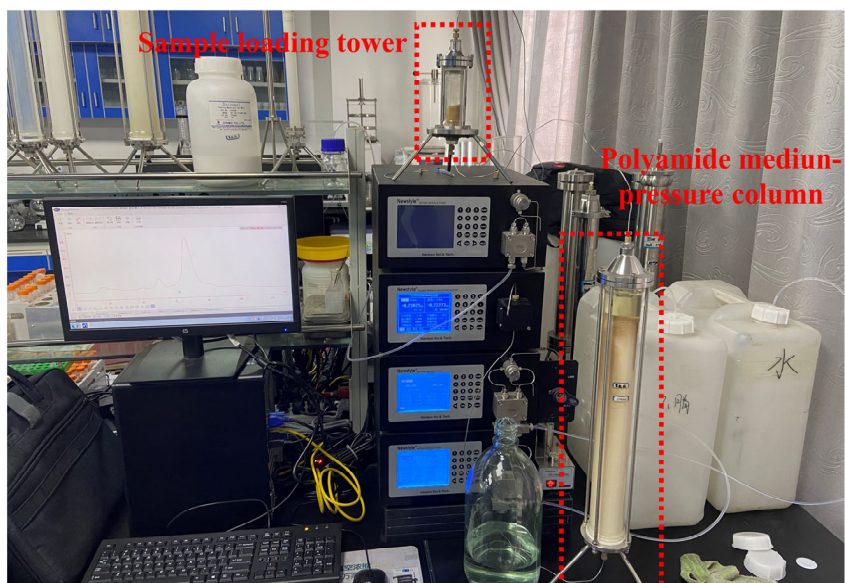

**B**

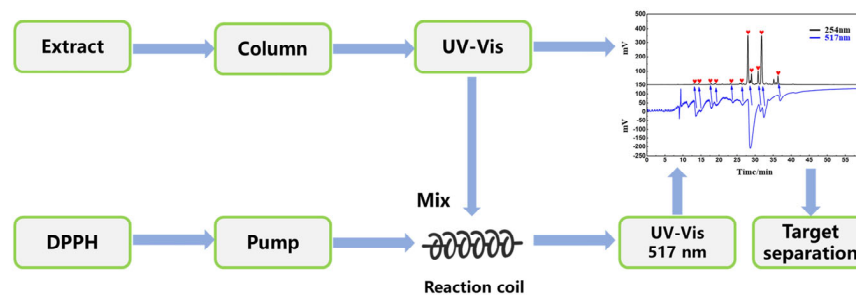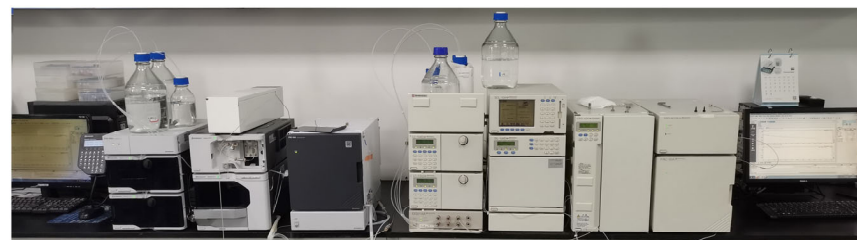

**Figure S2. Schematic diagram of substance extraction process**

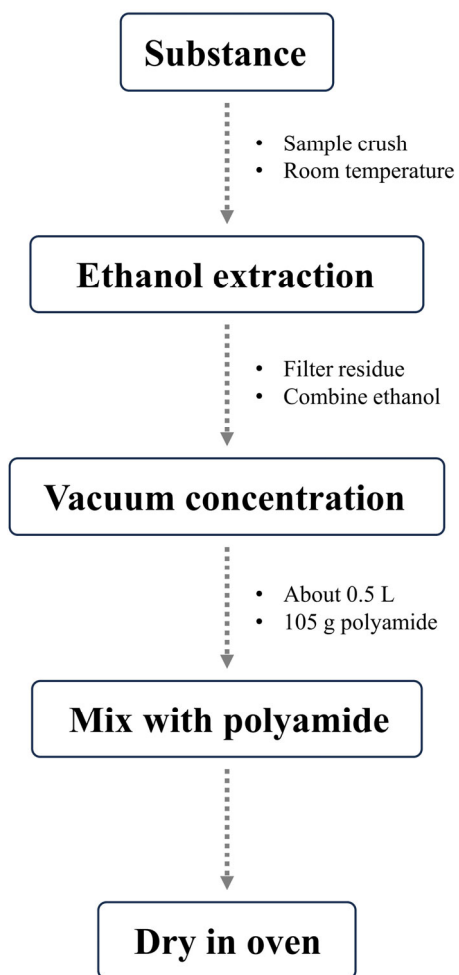

Figure S3. ESI-MS data of Fr4-1-1

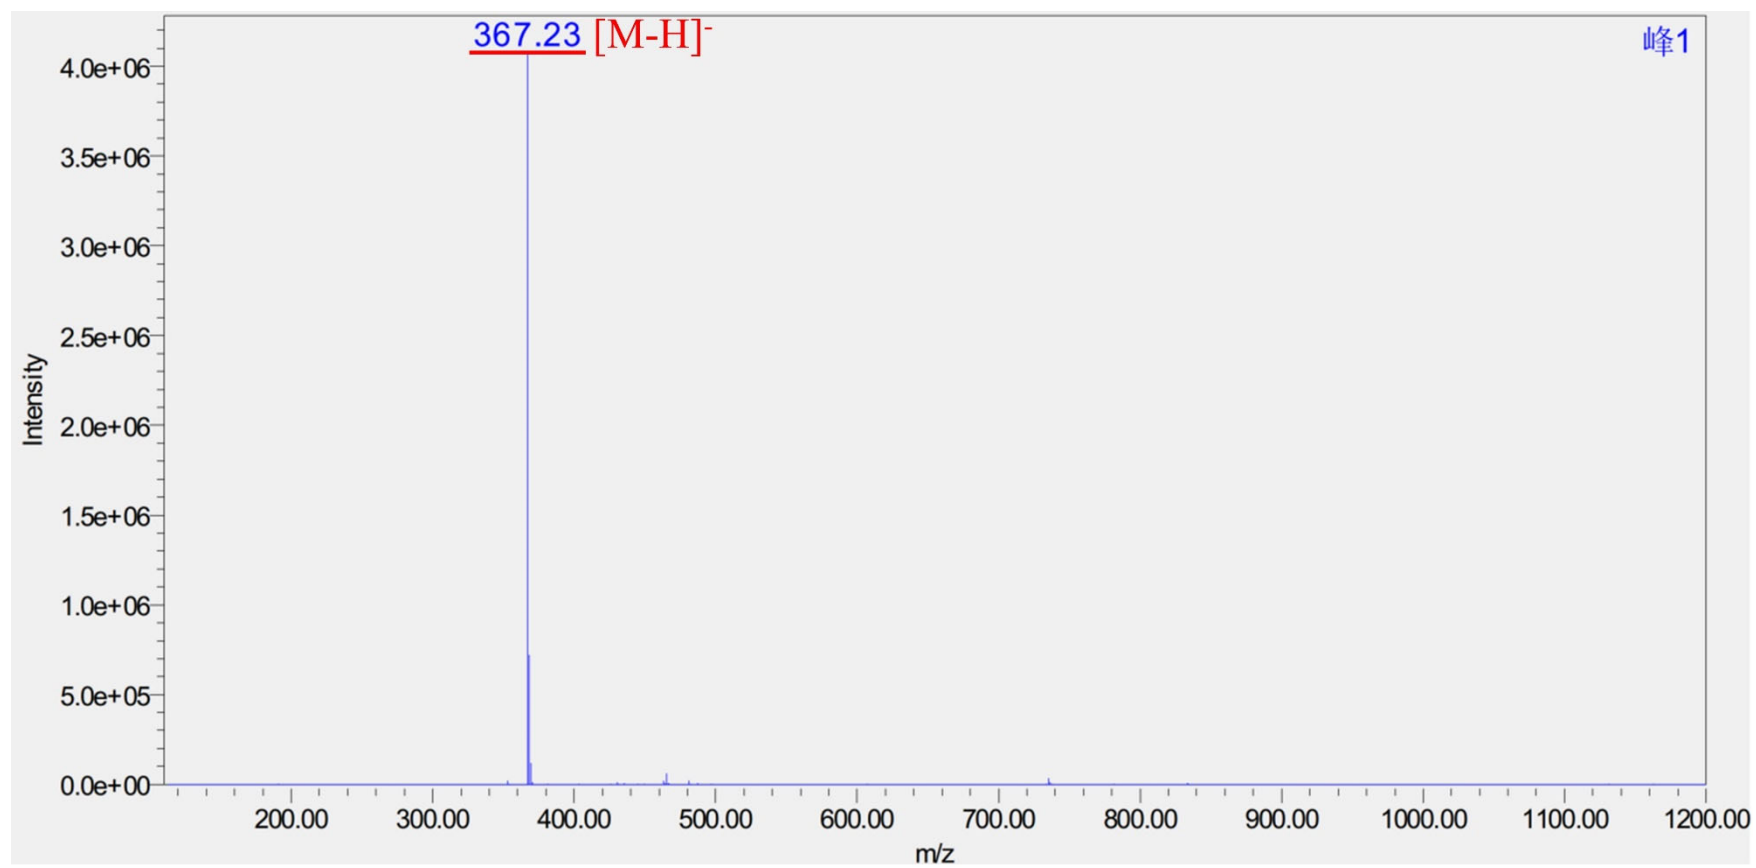

Figure S4.  $^1\text{H}$  NMR (600 MHz) data of Fr4-1-1 (in  $\text{DMSO-}d_6$ )

TCBZ 4-1-1

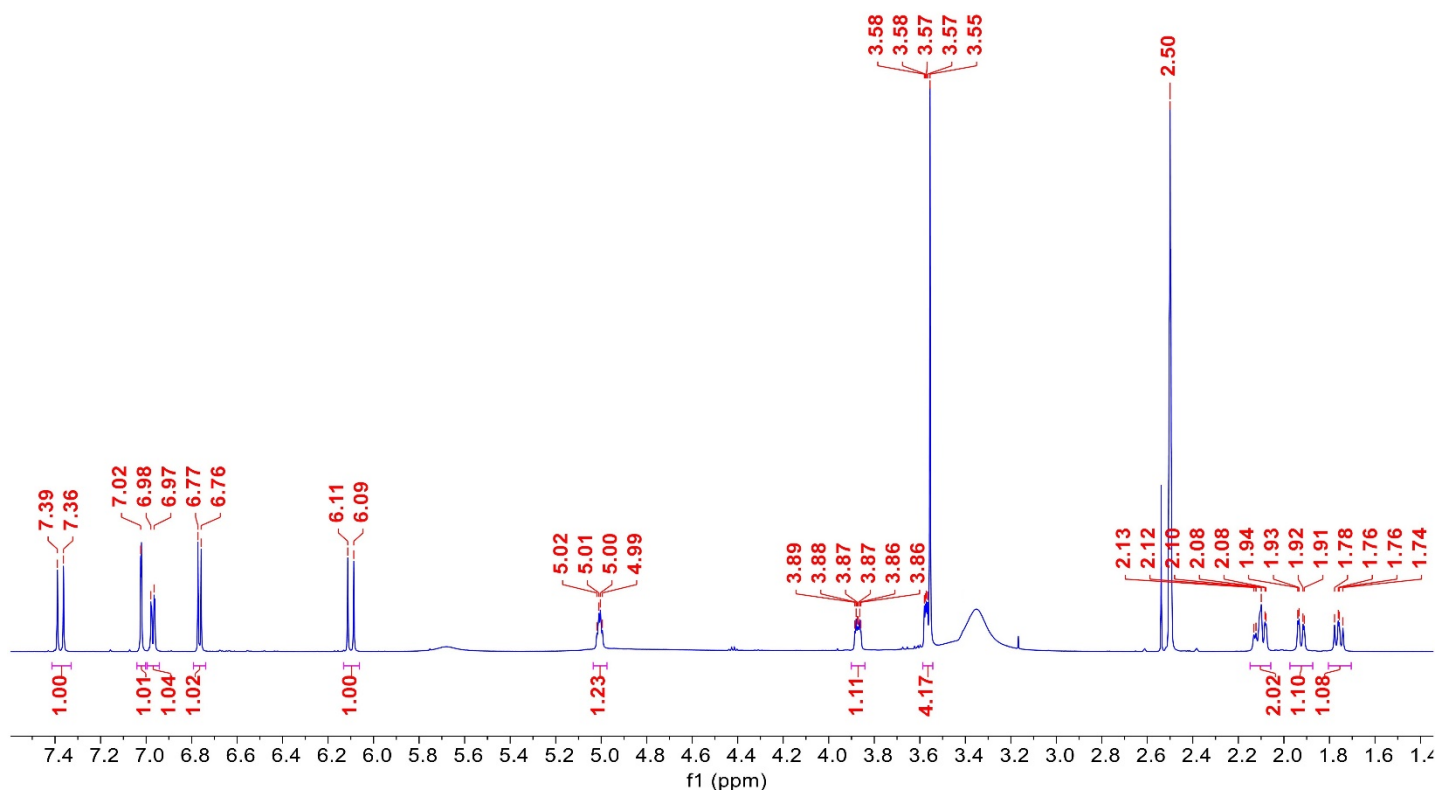

Figure S5.  $^{13}\text{C}$  NMR (151 MHz) data of Fr4-1-1 (in  $\text{DMSO-}d_6$ )

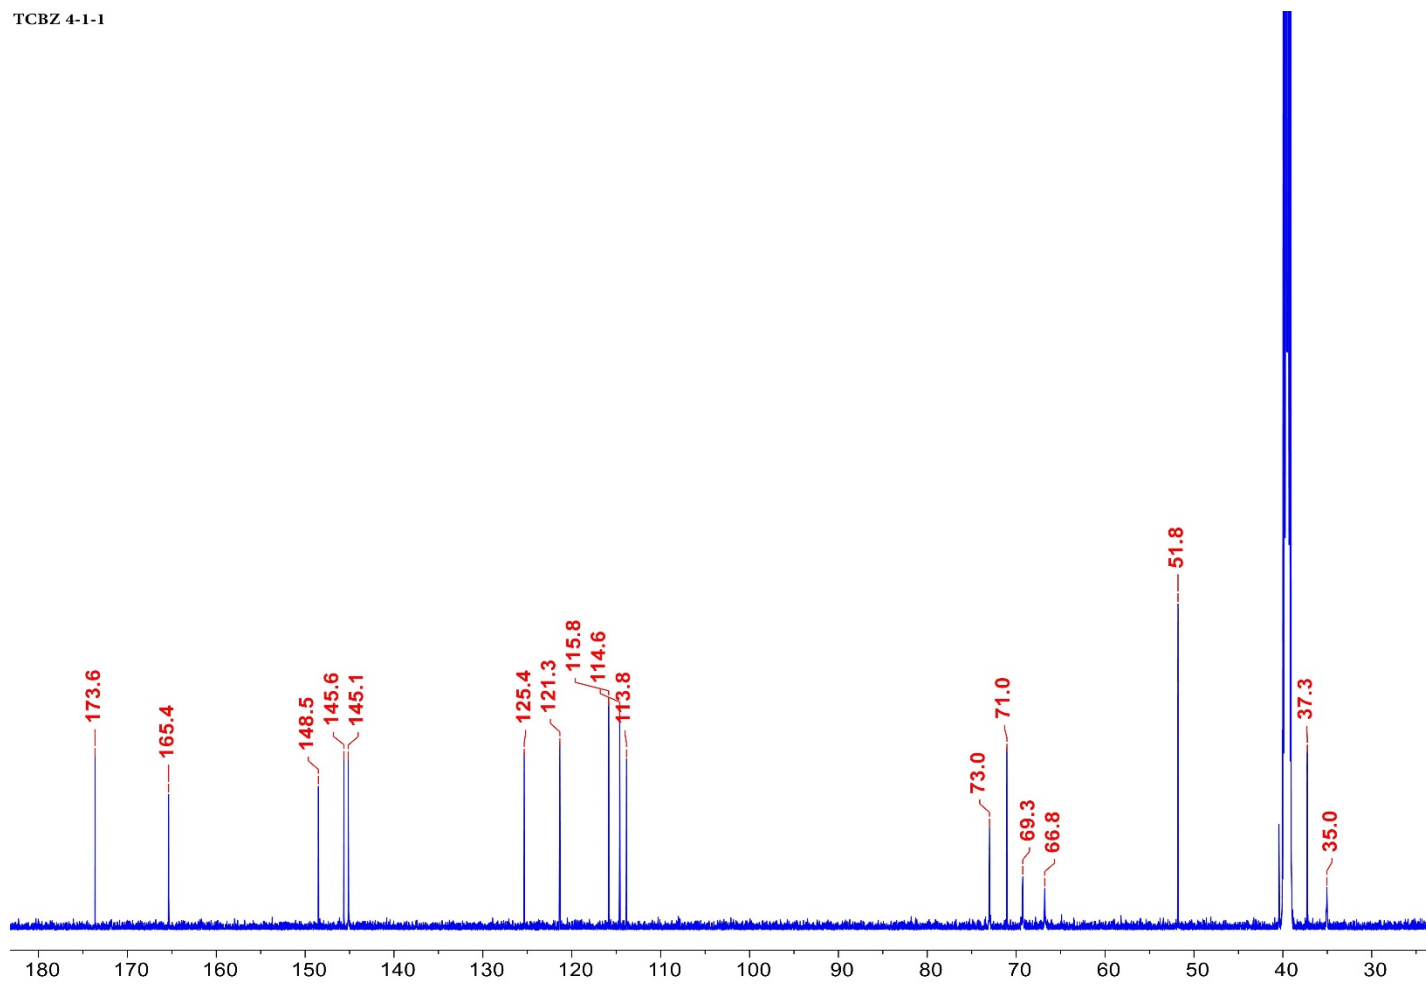

Figure S6. HR-ESI-MS data of Fr4-1-2

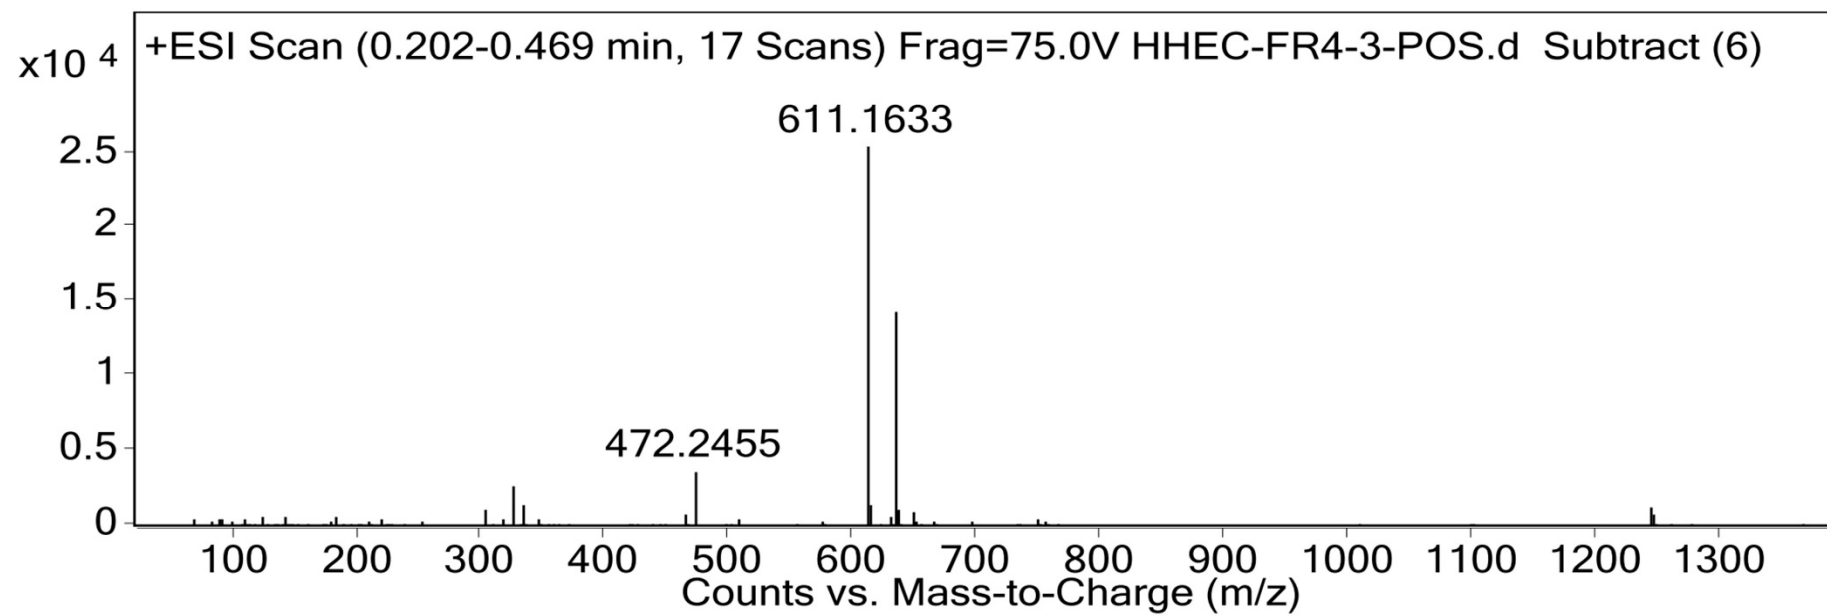



Figure S7.  $^1\text{H}$  NMR (600 MHz) data of Fr4-1-2 (in  $\text{MeOH-}d_4$ )

TCBZ 4-1-2

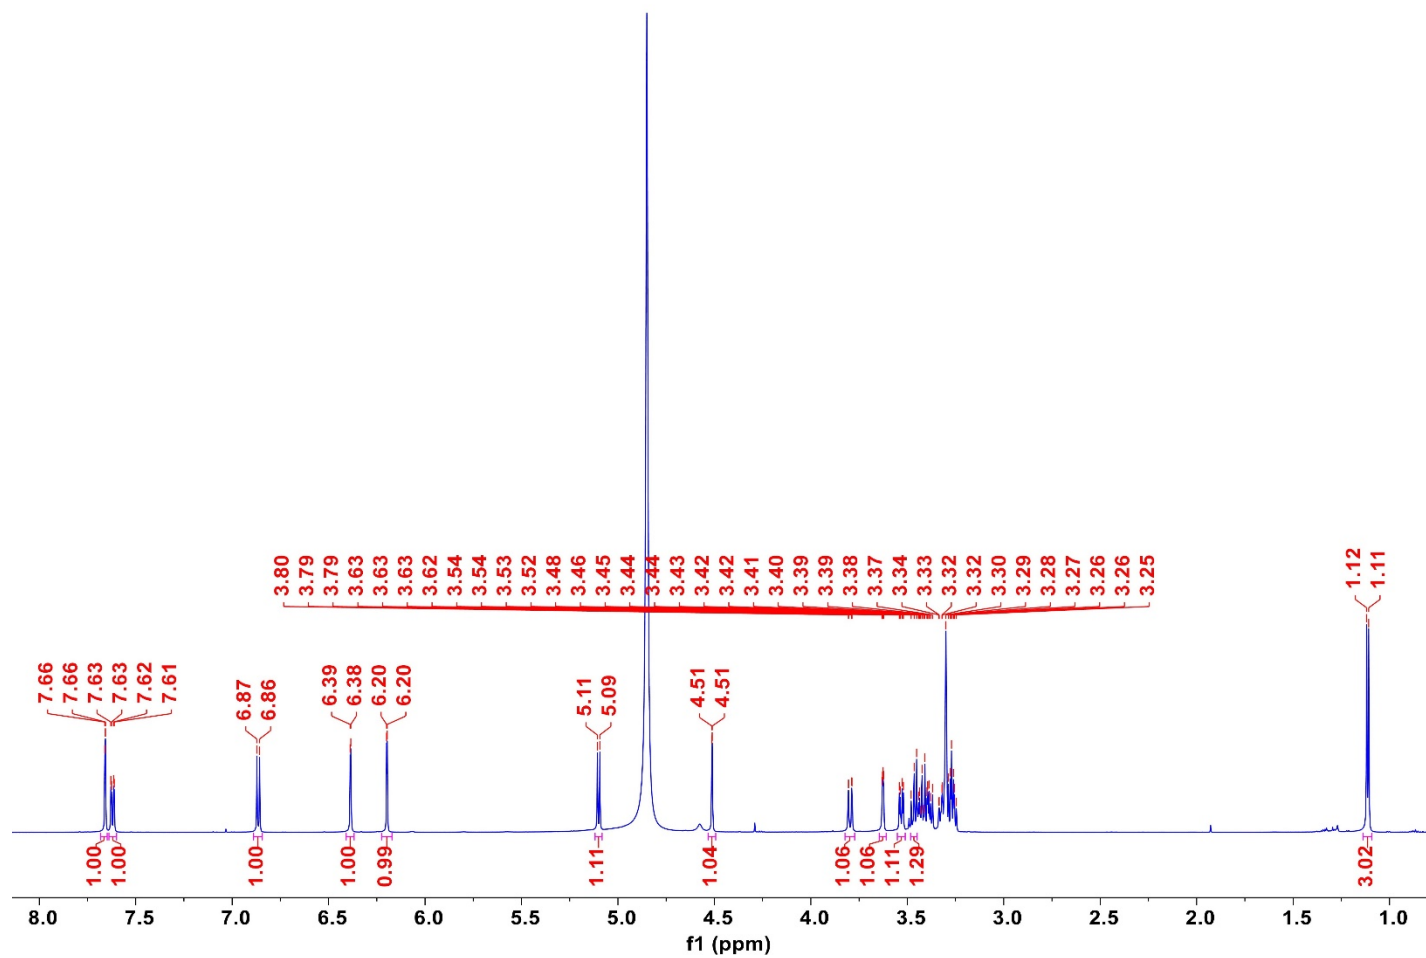

Figure S8.  $^{13}\text{C}$  NMR (151 MHz) data of Fr4-1-2 (in  $\text{MeOH-}d_4$ )

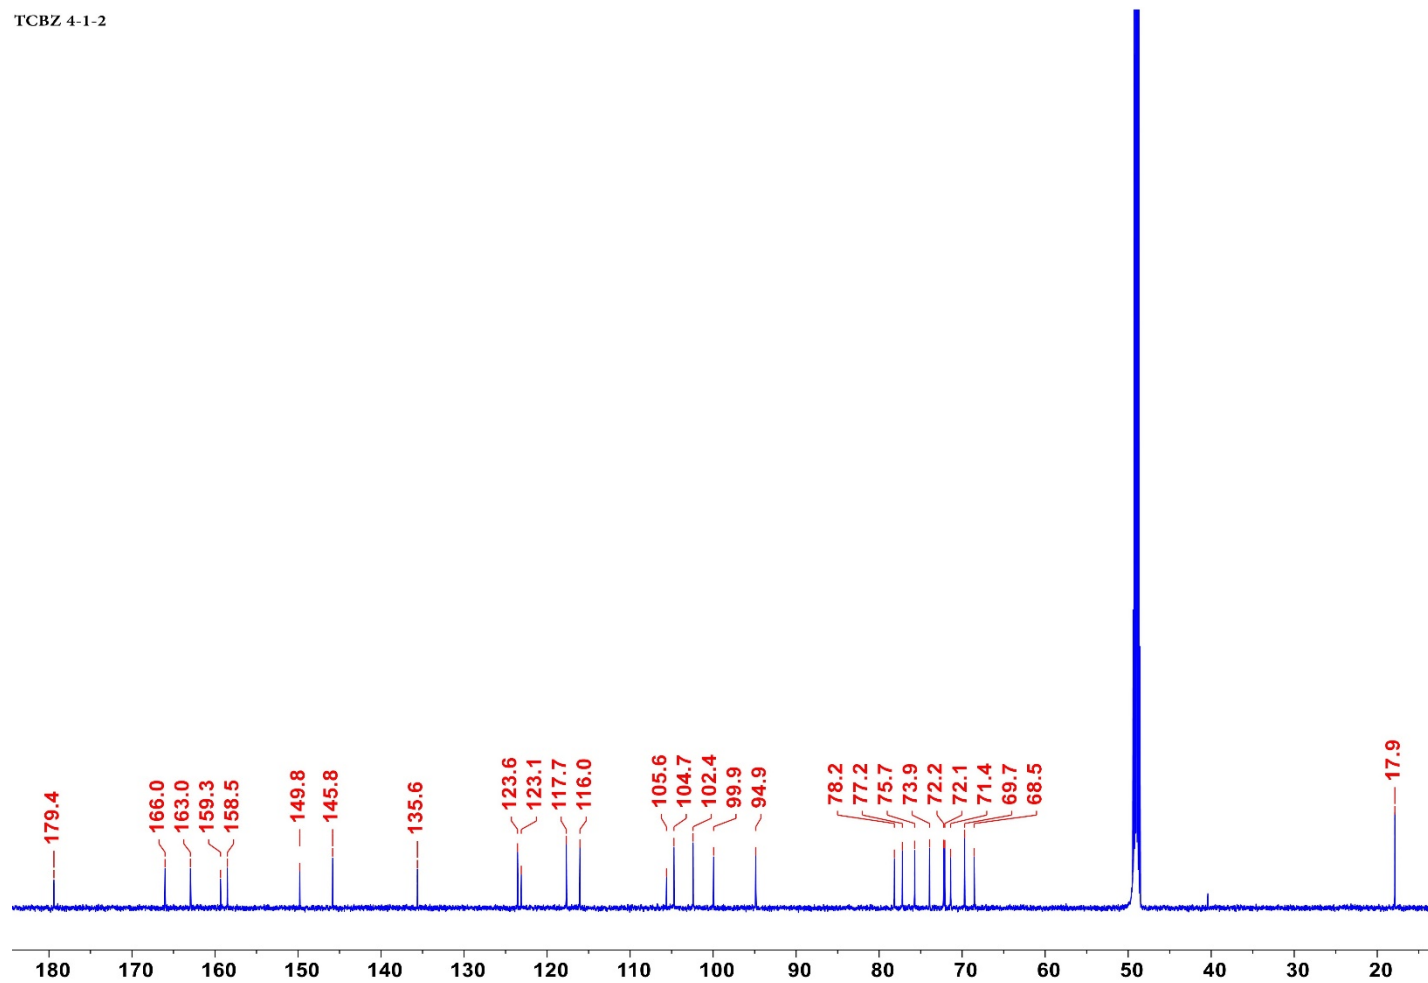

Figure S9. HMBC data of Fr4-1-2 (in MeOH- $d_4$ )

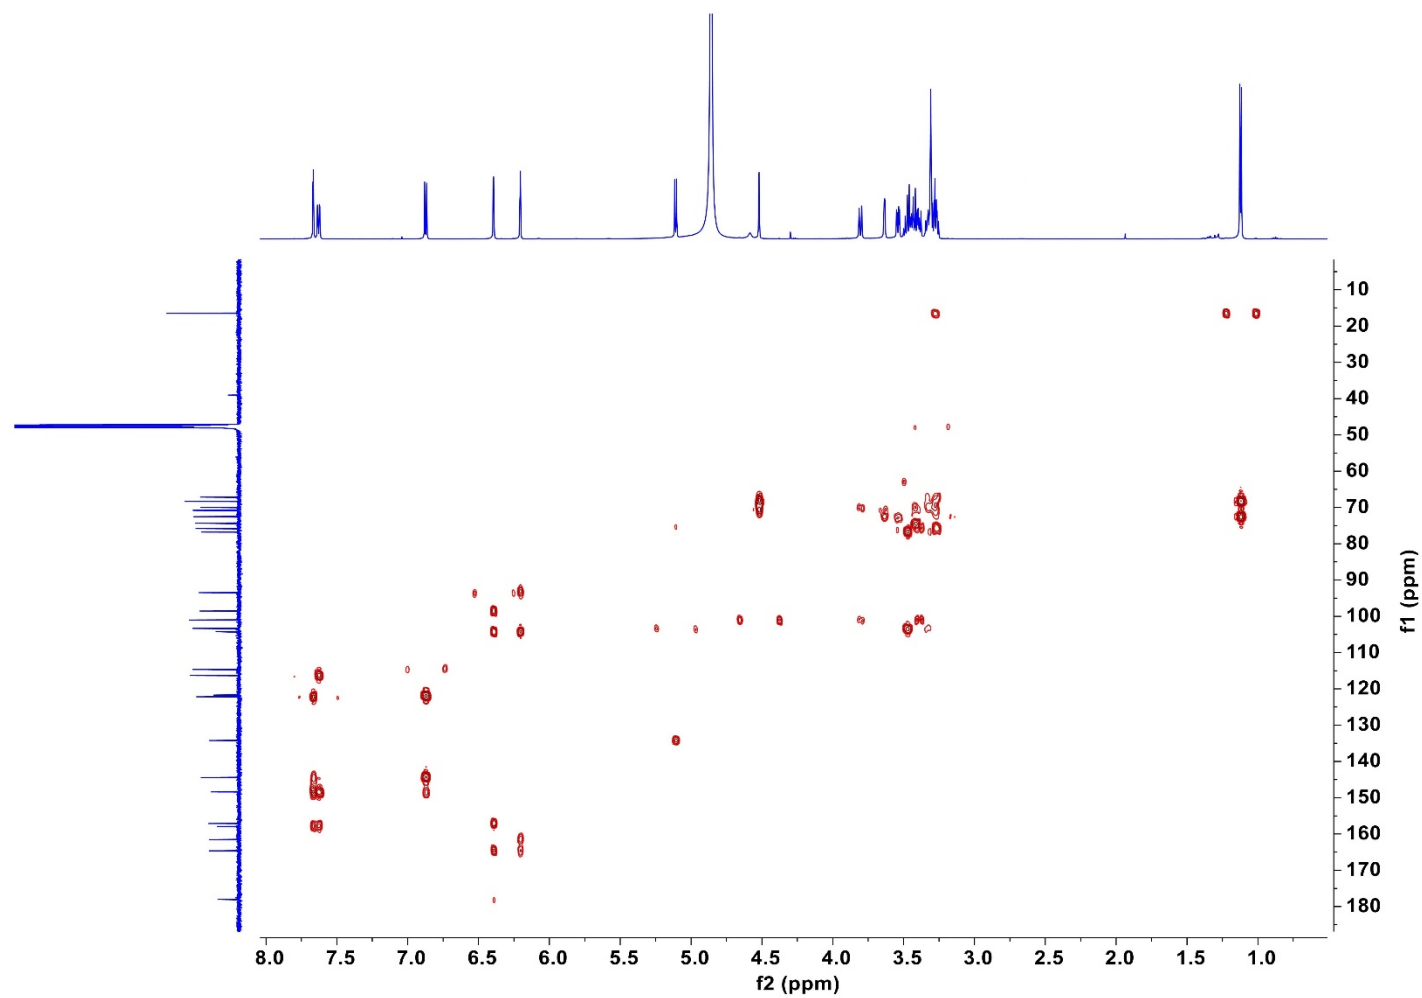

Figure S10. ESI-MS data of Fr4-2

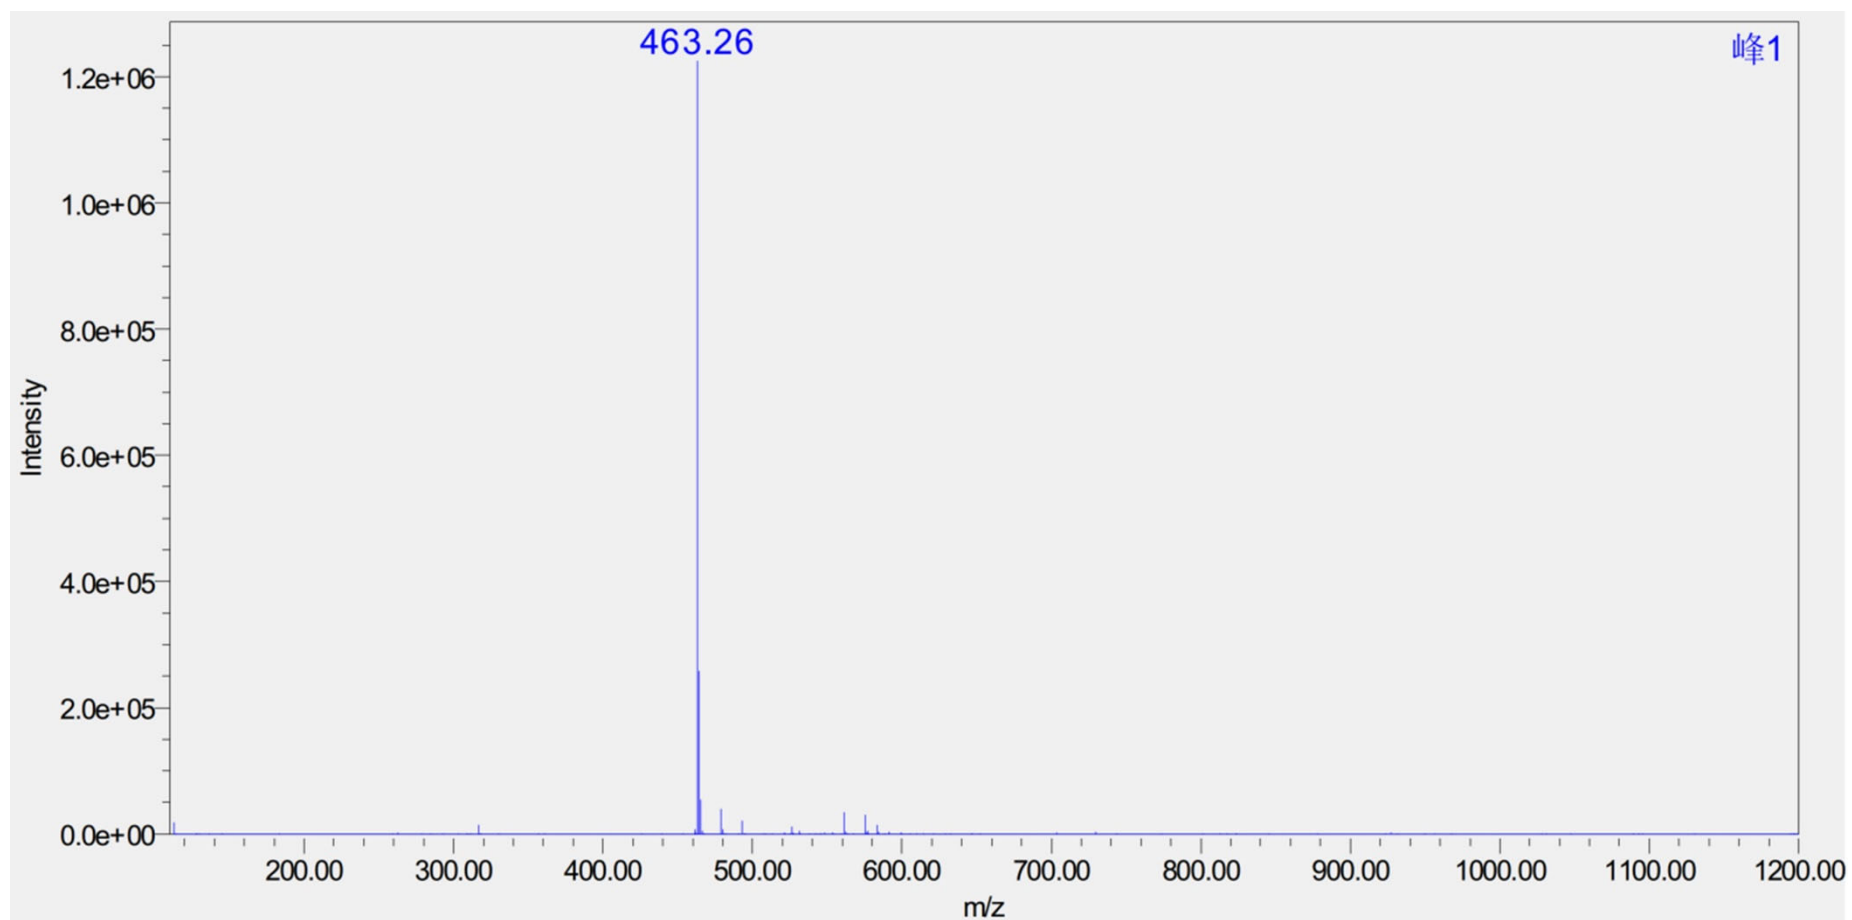

Figure S11.  $^1\text{H}$  NMR (600 MHz) data of Fr4-2 (in  $\text{DMSO-}d_6$ )

TCBZ 4-2

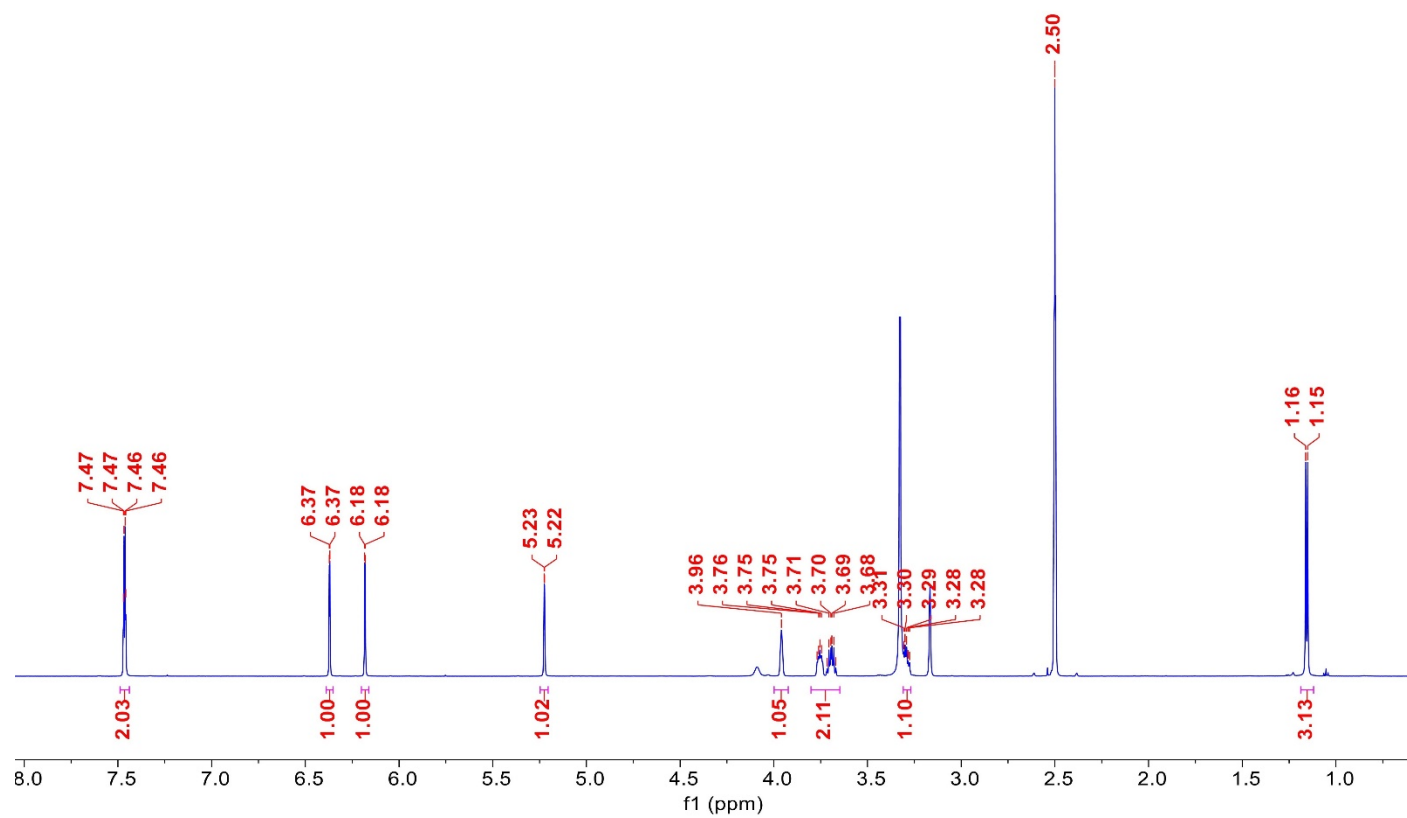

Figure S12.  $^{13}\text{C}$  NMR (151 MHz) data of Fr4-2 (in  $\text{DMSO-}d_6$ )

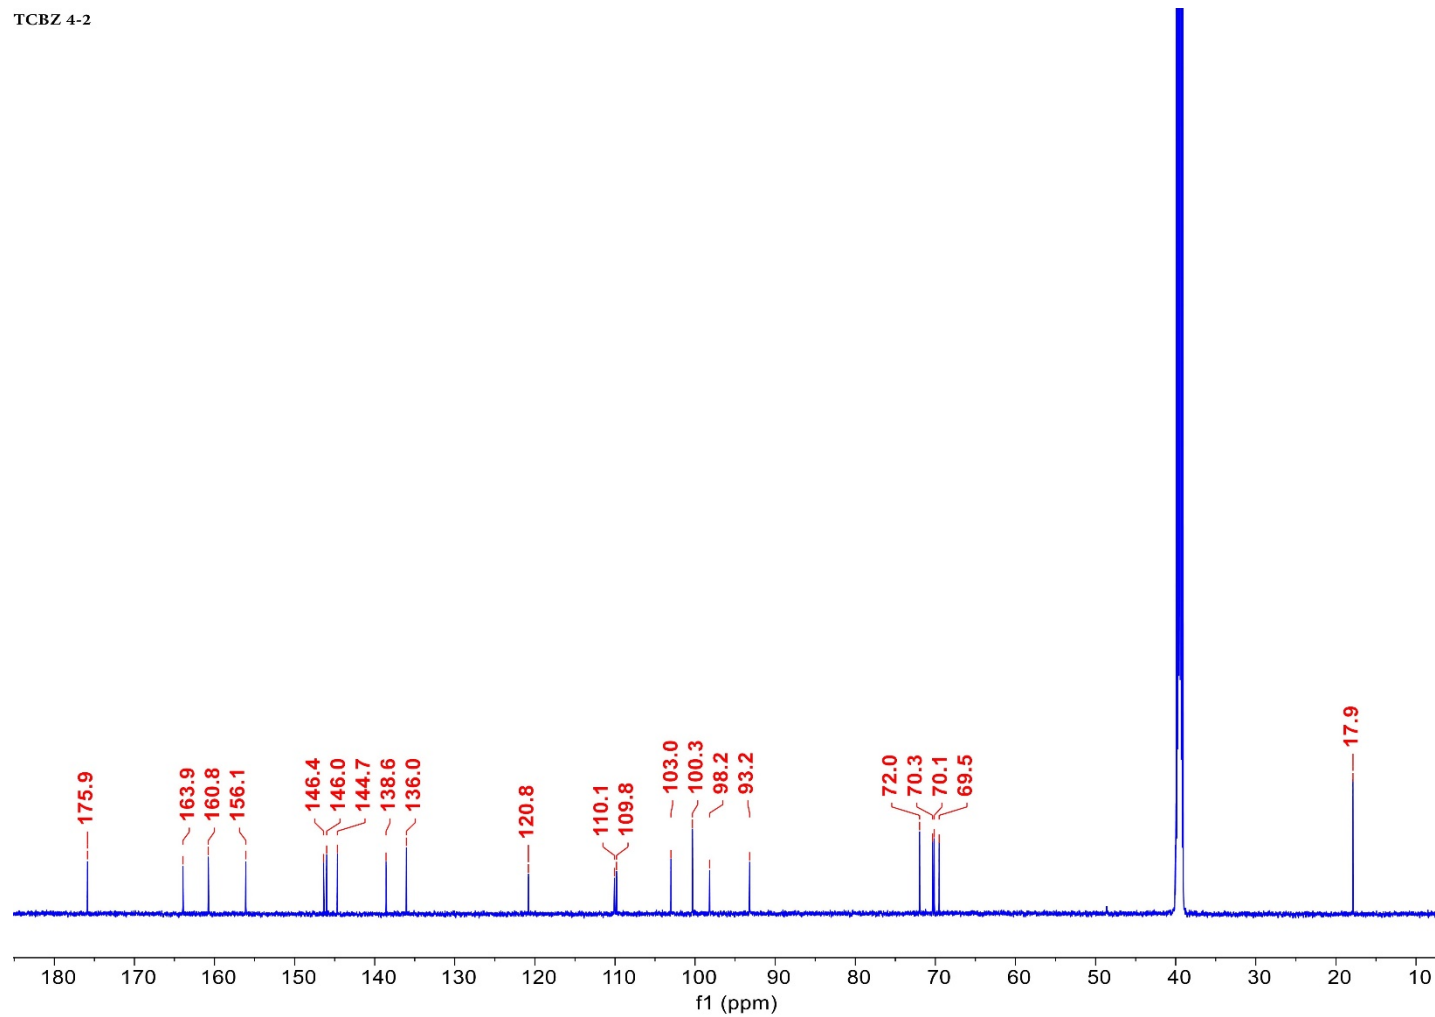

2D-interaction diagram between HO-1 and Fr4-1-1 (A); 2D-interaction diagram between HO-1 and Fr4-1-2 (B); 2D-interaction diagram between HO-1 and Fr4-2 (C); 2D-interaction diagram between Nrf2 and Fr4-1-1 (D); 2D-interaction diagram between Nrf2 and Fr4-1-2 (E); 2D-interaction diagram between Nrf2 and Fr4-2 (F); 2D-interaction diagram between iNOS and Fr4-1-1 (G); 2D-interaction diagram between iNOS and Fr4-1-2 (H); 2D-interaction diagram between HO-1 and Fr4-2 (I).

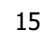

Figure S14. Histogram of all docking results

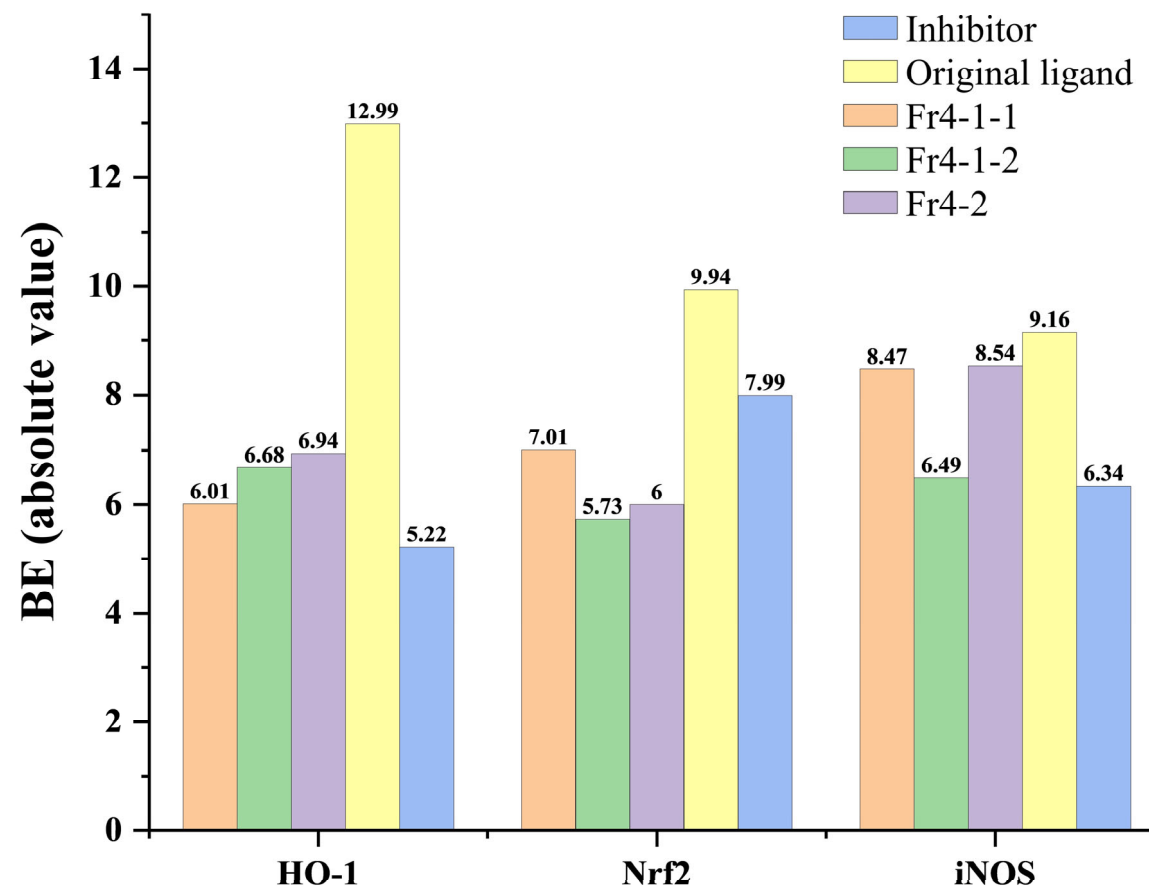



**Figure S15. The binding sites of small molecule ligands and target proteins**

2D-interaction diagram between HO-1 and Heme Oxygenase-1-IN-1 (A); 2D-interaction diagram between Nrf2 and ML385 (B); 2D-interaction diagram between iNOS and Isoquercetin (C); 2D-interaction diagram between HO-1 and HEM (D); 2D-interaction diagram between Nrf2 and IQK (E); 2D-interaction diagram between iNOS and 228 (F).

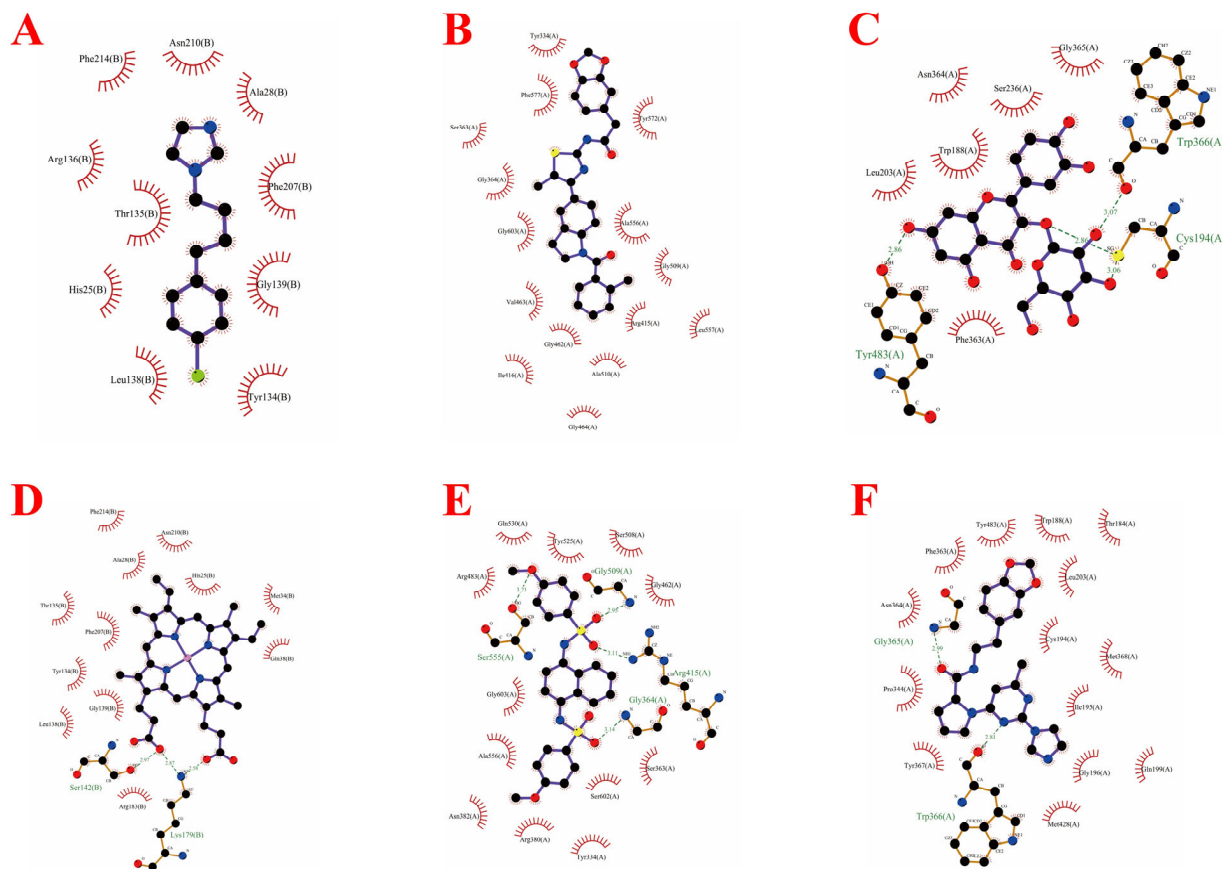

Supplement: s1 [file s1]
